# Supplementary material for: New Challenges in Targeting Signaling Pathways in Acute Lymphoblastic Leukemia by NGS Approaches: An Update
Source: MDPI journal article supplement (doi:10.3390/cancers10040110), 2018-04-07
Supplement: s1 [file s1]

**Supplemental File 2. References of Figure 2. (Part a)** Frequency of somatic mutations identified by NGS methods in childhood and adult B-ALL; **(Part b)** Frequency of somatic mutations identified by NGS methods in childhood and adult T-ALL.

| Part a           |                                          |                                  |                               |                                      |            |
|------------------|------------------------------------------|----------------------------------|-------------------------------|--------------------------------------|------------|
| Gene Symbol      | Main pathway                             | Frequency in children with B-ALL | Frequency in adult with B-ALL | Frequency in whole cohort with B-ALL | References |
| <i>ADARB1</i>    | Others                                   | 1%                               | 0%                            | 0,50%                                | [1]        |
| <i>ASXL1</i>     | Epigenetic regulator                     | 1%                               | 3,40%                         | 2,10%                                | [1–3]      |
| <i>BTG1</i>      | Lymphoid development and differentiation | 1%                               | 0,60%                         | 0,80%                                | [1]        |
| <i>c-MYC</i>     | Transcriptional processes                | 1%                               | 2,80%                         | 1,80%                                | [1,2]      |
| <i>CD3EAP</i>    | Others                                   | 1%                               | 0,60%                         | 0,80%                                | [1]        |
| <i>CLDN22</i>    | Others                                   | 0,50%                            | 1,10%                         | 0,80%                                | [1]        |
| <i>CREBBP</i>    | chromatin structure modifiers            | 3,40%                            | 2,20%                         | 2.9-5%                               | [1–3]      |
| <i>EBF1</i>      | Lymphoid development and differentiation | 0%                               | 1,10%                         | 0,50%                                | [1,2]      |
| <i>ERBB4</i>     | Others                                   | 2%                               | 1,10%                         | 1,60%                                | [1]        |
| <i>ETV6</i>      | Lymphoid development and differentiation | 2,50%                            | 2,20%                         | 3%                                   | [1,2,4]    |
| <i>EVI5L</i>     | Others                                   | 1,50%                            | 0,60%                         | 1%                                   | [1]        |
| <i>EZH2</i>      | Epigenetic regulator                     | 0,50%                            | 3,40%                         | 1,80%                                | [1–3]      |
| <i>FLT3</i>      | RAS pathway                              | 7%                               | 7%                            | 7%                                   | [1–4]      |
| <i>GNB1</i>      | Others                                   | 1,50%                            | 3,40%                         | 2,30%                                | [1]        |
| <i>GPR137C</i>   | Others                                   | 0,50%                            | 0,60%                         | 0,50%                                | [1]        |
| <i>HIST1H2AG</i> | Epigenetic regulator                     | 1%                               | 0                             | 0,50%                                | [1]        |
| <i>IKZF1</i>     | Lymphoid development and differentiation | 0,50%                            | 3,90%                         | 2,10%                                | [1,2]      |
| <i>INSRR</i>     | Others                                   | 1,50%                            | 1,70%                         | 1,60%                                | [1]        |
| <i>JAK1</i>      | Jak-STAT signaling pathway               | 1%                               | 1,10%                         | 1%                                   | [1,3,4]    |
| <i>JAK2</i>      | Jak-STAT signaling pathway               | 2%                               | 2,20%                         | 2.1-5%                               | [1,3–5]    |
| <i>JAK3</i>      | Jak-STAT signaling pathway               | 0%                               | 2,20%                         | 1%                                   | [1,3,4]    |
| <i>KCNV1</i>     | Others                                   | 0,5%                             | 0,60%                         | 0,5%                                 | [1]        |
| <i>KDM5C</i>     | Epigenetic regulator                     | 0,50%                            | 0,60%                         | 0,50%                                | [1]        |
| <i>KRAS</i>      | RAS pathway                              | 7,80%                            | 6,10%                         | 7%                                   | [1–4]      |
| <i>MET</i>       | Others                                   | 3,40%                            | 1,10%                         | 2,30%                                | [1]        |
| <i>KMT2D</i>     | Epigenetic regulator                     | 4,4%                             | 10,1%                         | 5-7%                                 | [1–3]      |
| <i>NF1</i>       | RAS pathway                              | 2,90%                            | 6,10%                         | 4,40%                                | [1–4]      |
| <i>NRAS</i>      | RAS pathway                              | 14,70%                           | 8,9%                          | 12-17%                               | [1–4]      |
| <i>P4HA2</i>     | Others                                   | 1,50%                            | 1,10%                         | 1,30%                                | [1]        |
| <i>PABPC3</i>    | Others                                   | 0%                               | 1,10%                         | 0,50%                                | [1]        |
| <i>PAX5</i>      | Lymphoid development and differentiation | 4,90%                            | 9,50%                         | 7%                                   | [1,2,4]    |

|                |                                          |       |       |         |           |
|----------------|------------------------------------------|-------|-------|---------|-----------|
| <i>PDE1A</i>   | Others                                   | 0,50% | 0,60% | 0,50%   | [1]       |
| <i>PHF6</i>    | chromatin structure modifiers            | 0%    | 1,10% | 0,50%   | [1]       |
| <i>PROKR1</i>  | Others                                   | 1%    | 1,10% | 1%      | [1]       |
| <i>PTPN11</i>  | RAS pathway                              | 6,90% | 2,20% | 4.7%-8% | [1–4]     |
| <i>RB1</i>     | Cell cycle and p53 signaling pathway     | 1%    | 0,60% | 0,80%   | [1,4]     |
| <i>RIT1</i>    | Others                                   | 0,50% | 1,10% | 0,80%   | [1]       |
| <i>RUNX1</i>   | Lymphoid development and differentiation | 2%    | 5%    | 3,40%   | [1,3]     |
| <i>SETD2</i>   | Epigenetic regulator                     | 5,90% | 7,30% | 6,50%   | [1,2]     |
| <i>SLC22A6</i> | Others                                   | 1%    | 0,60% | 0,80%   | [1]       |
| <i>ST6GAL2</i> | Others                                   | 0,50% | 0,60% | 0,50%   | [1]       |
| <i>TET2</i>    | Epigenetic regulator                     | 0,50% | 0,60% | 0.5-8%  | [1,3]     |
| <i>TP53</i>    | Cell cycle and p53 signaling pathway     | 1%    | 1,10% | 1-4%    | [1,2,4,5] |
| <i>UBA2</i>    | Others                                   | 2,90% | 0,60% | 1,80%   | [1]       |
| <i>XBP1</i>    | Lymphoid development and differentiation | 1%    | 2,20% | 1,60%   | [1]       |

**Part b.**

| <b>Gene Symbol</b> | <b>Main pathway</b>                  | <b>Frequency in children with T-ALL</b> | <b>Frequency in adult with T-ALL</b> | <b>Frequency in whole cohort with T-ALL</b> | <b>References</b> |
|--------------------|--------------------------------------|-----------------------------------------|--------------------------------------|---------------------------------------------|-------------------|
| <i>AKT1</i>        | PI3K-AKT-mTOR signaling pathway      | 2%                                      | 2%                                   | 2%                                          | [3,6–9]           |
| <i>ASXL2</i>       | Epigenetic regulator                 | 2%                                      |                                      |                                             | [8,9]             |
| <i>BAZ1A</i>       | Others                               | 2%                                      |                                      |                                             | [8]               |
| <i>BCL11B</i>      | Transcriptional processes            | 10%                                     | 9%                                   | 9%                                          | [7–11]            |
| <i>BCOR</i>        | Transcriptional processes            |                                         | 4%                                   |                                             | [9,11]            |
| <i>CBL</i>         | RAS pathway                          |                                         | 5%                                   | <3%                                         | [3,11]            |
| <i>CCND3</i>       | Cell cycle and p53 signaling pathway | 6%                                      |                                      |                                             | [8,9]             |
| <i>CDKN1B</i>      | Cell cycle and p53 signaling pathway | 2%                                      |                                      |                                             | [8]               |
| <i>CNOT3</i>       | Translation and RNA stability        | 3%                                      | 8%                                   |                                             | [7–10]            |
| <i>CREBBP</i>      | chromatin structure modifiers        | 2%                                      | ~ 10%                                |                                             | [3,8]             |
| <i>CRLF2</i>       | Jak-STAT signaling pathway           |                                         | ~ 7%                                 |                                             | [3]               |
| <i>CSF3R</i>       | PI3K-AKT-mTOR signaling pathway      |                                         | <3%                                  |                                             | [3]               |
| <i>CTCF</i>        | Epigenetic regulator                 | 5%                                      |                                      |                                             | [8,9]             |
| <i>DDX3X</i>       | Others                               | 2%                                      |                                      |                                             | [8]               |
| <i>DHX15</i>       | Splicing                             | 2%                                      |                                      |                                             | [8]               |

|               |                                          |        |         |        |            |
|---------------|------------------------------------------|--------|---------|--------|------------|
| <i>DIS3</i>   | Translation and RNA stability            |        | ~ 7%    |        | [3]        |
| <i>DLL4</i>   | NOTCH pathway                            |        | 14%     |        | [11]       |
| <i>DNM2</i>   | Transcriptional processes                | 11-13% | 13%-17% |        | [3,7-9,11] |
| <i>DNMT3A</i> | Epigenetic regulator                     | 1%     | 6-14%   | 5%     | [7,11]     |
| <i>EED</i>    | Epigenetic regulator                     | 5%     | 5%      |        | [7,9]      |
| <i>EP300</i>  | chromatin structure modifiers            |        | 5%      | 5%     | [9,11]     |
| <i>ETV6</i>   | Lymphoid development and differentiation | 3%     | 4%      |        | [7-9]      |
| <i>EZH2</i>   | Epigenetic regulator                     | 5-12%  | 12%     |        | [3,7-9,11] |
| <i>FANCA</i>  | Others                                   |        | <3%     | <3%    | [3]        |
| <i>FAT1</i>   | Wnt signaling                            | 2%     | 16%     |        | [3,8,11]   |
| <i>FAT3</i>   | Wnt signaling                            |        | 14%     |        | [11]       |
| <i>FBXW7</i>  | NOTCH pathway                            | 14-24% | 11-14%  | 11-20% | [3,7-11]   |
| <i>FLT3</i>   | RAS pathway                              | 5-6%   | 4%      | 3%     | [3,7,8,11] |
| <i>GATA2</i>  | chromatin structure modifiers            |        | ~ 7%    |        | [3]        |
| <i>GATA3</i>  | Transcriptional processes                | 2-5%   | 3%      | <3%    | [3,7-9]    |
| <i>HERC1</i>  | DNA repair                               |        | 9%      |        | [11]       |
| <i>HES1</i>   | NOTCH pathway                            |        | 14%     |        | [11]       |
| <i>HUWE1</i>  | Others                                   | 2%     |         |        | [8]        |
| <i>IDH1</i>   | Epigenetic regulator                     |        | 10%     |        | [11]       |
| <i>IDH2</i>   | Epigenetic regulator                     |        | 10%     |        | [11]       |
| <i>IL7R</i>   | Jak-STAT signaling pathway               | 7-10%  | 12%     |        | [7-9,11]   |
| <i>JAG1</i>   | NOTCH pathway                            |        | 14%     |        | [11]       |
| <i>JAG2</i>   | NOTCH pathway                            |        | 14%     |        | [11]       |
| <i>JAK1</i>   | Jak-STAT signaling pathway               | 3-5%   | 7%      |        | [3,7-9,11] |
| <i>JAK3</i>   | Jak-STAT signaling pathway               | 8-10%  | 12-14%  |        | [3,7-9,11] |
| <i>KDM6A</i>  | Epigenetic regulator                     | 5-6%   | 7%      |        | [8-10]     |
| <i>KMT2A</i>  | Epigenetic regulator                     | 2%     |         |        | [8,9]      |
| <i>KMT2C</i>  | Epigenetic regulator                     | 2%     |         |        | [8,9]      |
| <i>KMT2D</i>  | Epigenetic regulator                     | 2%     | 12%     | 12%    | [8,9,11]   |
| <i>KRAS</i>   | RAS pathway                              | 3-6%   | 5%      | 16%    | [3,7-9,11] |
| <i>LEF1</i>   | Lymphoid development and differentiation | 4%     | 2%      |        | [8,9]      |
| <i>MED12</i>  | Others                                   | 3%     |         |        | [8,9]      |
| <i>MTMR3</i>  | Others                                   |        | 4%      |        | [11]       |
| <i>mTOR</i>   | PI3K-AKT-mTOR signaling pathway          |        | 5%      |        | [7,9]      |
| <i>MYB</i>    | Transcriptional processes                | 5%     |         |        | [8,9]      |
| <i>MYCN</i>   | Transcriptional processes                | 2%     |         |        | [8]        |
| <i>NOTCH1</i> | NOTCH pathway                            | 50-74% | 53-57%  | 50-56% | [3,7-11]   |
| <i>NOTCH2</i> | NOTCH pathway                            |        | 14%     |        | [3,11]     |
| <i>NOTCH3</i> | NOTCH pathway                            |        | 14%     |        | [11]       |

|                |                                          |         |        |      |            |
|----------------|------------------------------------------|---------|--------|------|------------|
| <i>NRAS</i>    | RAS pathway                              | 8-14%   | 9%-11% | 17%  | [3,7-9]    |
| <i>ORAI1</i>   | Others                                   | 2%      |        |      | [8]        |
| <i>PHF6</i>    | chromatin structure modifiers            | 16%-19% | 14%    | 20%  | [3,7-11]   |
| <i>PIK3C2B</i> | PI3K-AKT-mTOR signaling pathway          |         | 15%    |      | [11]       |
| <i>PIK3CA</i>  | PI3K-AKT-mTOR signaling pathway          | 1%      | 5%     |      | [7]        |
| <i>PIK3CD</i>  | PI3K-AKT-mTOR signaling pathway          | 2%      |        |      | [8]        |
| <i>PIK3R1</i>  | PI3K-AKT-mTOR signaling pathway          | 6%      |        |      | [8,9]      |
| <i>PRC2</i>    | Others                                   |         | 11%    |      | [11]       |
| <i>PRKCZ</i>   | Others                                   |         | 4%     |      | [11]       |
| <i>PTEN</i>    | PI3K-AKT-mTOR signaling pathway          | 14-19%  | 11%    | 6-8% | [7-9,11]   |
| <i>PTPN2</i>   | Jak-STAT signaling pathway               | 3%      | 7%     |      | [7]        |
| <i>RELN</i>    | Transcriptional processes                |         | <3%    | 9%   | [3,11]     |
| <i>RPL5</i>    | Translation and RNA stability            | 2%      | 2%     |      | [7,8,10]   |
| <i>RPL10</i>   | Translation and RNA stability            | 6-8%    | 1%     |      | [7-10]     |
| <i>RPL22</i>   | Translation and RNA stability            | 4%      | 0%     |      | [7]        |
| <i>RUNX1</i>   | Lymphoid development and differentiation | 5-8%    | 10%    | 9%   | [3,7-9,11] |
| <i>SETBP1</i>  | Epigenetic regulator                     |         | ~ 7%   |      | [3]        |
| <i>SF3B1</i>   | Splicing                                 |         | 7%     |      | [3,11]     |
| <i>SH2B3</i>   | Jak-STAT signaling pathway               |         | <3%    |      | [3]        |
| <i>SMARCA4</i> | Epigenetic regulator                     | 3%      |        |      | [8]        |
| <i>STAT5B</i>  | Jak-STAT signaling pathway               | 4-6%    | 6%     |      | [7-9,12]   |
| <i>SUZ12</i>   | Epigenetic regulator                     | 3%      | 5%     | 5%   | [7-9,11]   |
| <i>TSPYL2</i>  | Others                                   | 2%      |        |      | [8]        |
| <i>U2AF1</i>   | Splicing                                 | 2%      | <3%    |      | [3,8]      |
| <i>USP7</i>    | Others                                   | 12%     |        |      | [8,9]      |
| <i>USP9X</i>   | Others                                   | 3%      |        |      | [8,9]      |
| <i>WHSC1</i>   | Epigenetic regulator                     |         | 5%     |      | [11]       |
| <i>WT1</i>     | Transcriptional processes                | 9-19%   | 11-12% | 10%  | [3,7-11]   |
| <i>XIAP</i>    | Others                                   |         | <3%    |      | [3]        |
| <i>ZRSR2</i>   | Splicing                                 |         | 4%     |      | [11]       |

## References

1. Liu, Y.F.; Wang, B.Y.; Zhang, W.N.; Huang, J.Y.; Li, B.S.; Zhang, M.; Jiang, L.; Li, J.F.; Wang, M.J.; Dai, Y.J.; et al. Genomic profiling of adult and pediatric b-cell acute lymphoblastic leukemia. *EBioMedicine* **2016**, *8*, 173-183.
2. Zhang, J.; McCastlain, K.; Yoshihara, H.; Xu, B.; Chang, Y.; Churchman, M.L.; Wu, G.; Li, Y.; Wei, L.; Iacobucci, I.; et al. Deregulation of dux4 and erg in acute lymphoblastic leukemia. *Nat. Genet.* **2016**, *48*, 1481-1489.

3. Feng, J.; Li, Y.; Jia, Y.; Fang, Q.; Gong, X.; Dong, X.; Ru, K.; Li, Q.; Zhao, X.; Liu, K. ; et al. Spectrum of somatic mutations detected by targeted next-generation sequencing and their prognostic significance in adult patients with acute lymphoblastic leukemia. *J. Hematol. Oncol.* **2017**, *10*, 61.
4. Roberts, K.G.; Li, Y.; Payne-Turner, D.; Harvey, R.C.; Yang, Y.L.; Pei, D.; McCastlain, K.; Ding, L.; Lu, C.; Song, G.; et al. Targetable kinase-activating lesions in ph-like acute lymphoblastic leukemia. *N. Engl. J. Med.* **2014**, *371*, 1005–1015.
5. Forero-Castro, M.; Robledo, C.; Benito, R.; Bodega-Mayor, I.; Rapado, I.; Hernandez-Sanchez, M.; Abaigar, M.; Maria Hernandez-Sanchez, J.; Quijada-Alamo, M.; Maria Sanchez-Pina, J.; et al. Mutations in tp53 and jak2 are independent prognostic biomarkers in b-cell precursor acute lymphoblastic leukaemia. *Br. J. Cancer* **2017**.
6. Fransecky, L.; Mochmann, L.H.; Baldus, C.D. Outlook on pi3k/akt/mtor inhibition in acute leukemia. *Mol. Cell. Ther.* **2015**, *3*, 2.
7. Girardi, T.; Vicente, C.; Cools, J.; De Keersmaecker, K. The genetics and molecular biology of t-all. *Blood* **2017**, *129*, 1113–1123.
8. Liu, Y.; Easton, J.; Shao, Y.; Maciaszek, J.; Wang, Z.; Wilkinson, M.R.; McCastlain, K.; Edmonson, M.; Pounds, S.B.; Shi, L.; et al. The genomic landscape of pediatric and young adult t-lineage acute lymphoblastic leukemia. *Nat. Genet.* **2017**, *49*, 1211–1218.
9. Seki, M.; Kimura, S.; Isobe, T.; Yoshida, K.; Ueno, H.; Nakajima-Takagi, Y.; Wang, C.; Lin, L.; Kon, A.; Suzuki, H.; et al. Recurrent spi1 (pu.1) fusions in high-risk pediatric t cell acute lymphoblastic leukemia. *Nat. Genet.* **2017**, *49*, 1274–1281.
10. De Keersmaecker, K.; Atak, Z.K.; Li, N.; Vicente, C.; Patchett, S.; Girardi, T.; Gianfelici, V.; Geerdens, E.; Clappier, E.; Porcu, M.; et al. Exome sequencing identifies mutation in cnot3 and ribosomal genes rpl5 and rpl10 in t-cell acute lymphoblastic leukemia. *Nat. Genet.* **2013**, *45*, 186–190.
11. Neumann, M.; Vosberg, S.; Schlee, C.; Heesch, S.; Schwartz, S.; Gokbuget, N.; Hoelzer, D.; Graf, A.; Krebs, S.; Bartram, I.; et al. Mutational spectrum of adult t-all. *Oncotarget* **2015**, *6*, 2754–2766.
12. Kontro, M.; Kuusanmaki, H.; Eldfors, S.; Burmeister, T.; Andersson, E.I.; Bruserud, O.; Brummendorf, T.H.; Edgren, H.; Gjertsen, B.T.; Itala-Remes, M.; et al. Novel activating stat5b mutations as putative drivers of t-cell acute lymphoblastic leukemia. *Leukemia* **2014**, *28*, 1738–1742.
