# Supplementary material for: New Challenges in Targeting Signaling Pathways in Acute Lymphoblastic Leukemia by NGS Approaches: An Update
Source: MDPI journal article supplement (doi:10.3390/cancers10040110), 2018-04-07
Supplement: s1 [file s1]

**Supplemental File 1. Table S1.** Frequency and prognosis value of cytogenetic and molecular genetic abnormalities identified in ALL.

| Genetic abnormalities [1–8]                         | Whole cohort [1,9,10] | Pediatric | Adult  | Prognosis [3,11–15] |
|-----------------------------------------------------|-----------------------|-----------|--------|---------------------|
| <b>B-ALL</b>                                        |                       |           |        |                     |
| Hyperdiploidy (>50 and <60 chromosomes)             | 20%-30%               | 25%       | 5-10%  | Favorable           |
| Near-haploid 24-31 chromosomes                      | 1–3%                  |           |        | Adverse             |
| Low hypodiploid 32-39 chromosomes                   | 1–3%                  |           |        | Adverse             |
| High hypodiploid 40-43 chromosomes                  | 1–3%                  |           |        | Adverse             |
| Near-diploid 44-45 chromosomes                      |                       |           |        | Favorable           |
| <i>TEL-AML1 (ETV6-RUNX1) t(12;21)</i>               | 15–25%                | 20–30%    | 2%     | Favorable           |
| <i>KMT2A (MLL) rearranged t(v;11q23)</i>            | 5–6%                  | 8%        | 10%    | Adverse             |
| <i>E2A-PBX1(TCF3-PBX1) t(1;19)</i>                  | 2–6%                  | 5%        | 3%     | Favorable           |
| <i>BCR-ABL t(9;22)</i>                              | 2–5%                  | 2–4%      | 25%    | Improved *          |
| <i>IL3-IGH@ t(5;14)(q31;q32)</i>                    | rare                  | <1%       | <1%    | Intermediate        |
| <i>CRLF2 rearrangement (IGH-CRLF2; P2RY8-CRLF2)</i> | 5–7%                  |           |        | Adverse **          |
| <i>BCR-ABL1-like' or Ph-like</i>                    | 10–15%                | 10%       | 20%    | Adverse             |
| <i>iAMP21</i>                                       | 2%                    |           |        | Adverse             |
| <i>TCF3-HLF t(17;19)</i>                            | <0.5%                 |           |        | Adverse             |
| <i>DUX4- and ERG-deregulated</i>                    |                       |           |        | Favorable           |
| <i>MEF2D-rearranged</i>                             |                       | 3% to 4%  | 6%     | Unknown             |
| <i>ZNF384-rearranged</i>                            |                       | 3%        | 7%     | Unknown             |
| <i>PAX5 rearrangement</i>                           | 2%                    |           |        | Unknown             |
| <b>T-ALL</b>                                        |                       |           |        |                     |
| <b>TCR rearrangements</b>                           |                       |           |        |                     |
| <i>TLX1 (HOX11) (10q24)</i>                         | 5–10%                 | 7%        | 30%    | Favorable           |
| <i>TLX3 (HOX11L2) (5q35)</i>                        | 20–25%                | 20%       | 10-15% | Adverse ***         |
| <i>TAL1(SCL) (1p32)</i>                             | 15–18%                | 7%        | 12%    | Favorable           |
| <i>TAL2 (9q34)</i>                                  | <1%                   |           |        | Unknown             |
| <i>LMO1/ RBTN1 (11p15)</i>                          | 10%                   |           |        | Favorable           |
| <i>LMO2/RBTN2 (11p13)</i>                           | 10%                   |           |        | Favorable           |
| <i>LYL1 (19p13)</i>                                 | <1%                   | 1.5%      | 3%     | Adverse             |
| <i>BHLHB1 (21q22)</i>                               | <1%                   |           |        | Unknown             |
| <i>LCK (1p34)</i>                                   | <1%                   |           |        | Unknown             |
| <i>NOTCH1/TAN1 (9q34)</i>                           | <1%                   |           |        | Unknown             |
| <i>MYC (8q24)</i>                                   |                       |           |        | Unknown             |
| <i>TCL1(14q32)</i>                                  |                       |           |        | Unknown             |
| <i>CCND2 (12p13.32)</i>                             | <1%                   |           |        | Unknown             |
| <i>MTCP1 (Xq28)</i>                                 |                       |           |        | Unknown             |
| <b>Non-TCR rearrangements</b>                       |                       |           |        |                     |
| <i>SIL-TAL1(SCL)</i>                                | 9–30%                 |           |        | Unknown             |
| <i>PICALM(CALM)-MLLT10(AF10)</i>                    | 5–10%                 |           |        | Unknown             |
| <i>E2A/PBX1</i>                                     |                       |           |        | Unknown             |
| <i>NOTCH1(TAN1)-fusions</i>                         |                       |           |        | Unknown             |
| <i>KMT2A (MLL)-MLLT1(ENL)</i>                       | 2–5%                  | 0.2%      | 0.5%   | Favorable           |
| <i>KMT2A (MLL) rearrangements</i>                   | 5%                    |           |        | Adverse             |
| <i>NUP98-SETBP1</i>                                 |                       |           |        | Unknown             |
| <i>NUP98-RAP1GDS1</i>                               |                       |           |        | Unknown             |
| <i>NUP98-ADD3</i>                                   |                       |           |        | Unknown             |
| <i>BCR-ABL1(Ph+)</i>                                | <1%                   |           |        | Adverse             |
| <i>EML1-ABL1</i>                                    | <1%                   |           |        | Unknown             |

|                        |       |  |  |                                                      |
|------------------------|-------|--|--|------------------------------------------------------|
| NUP214(CAN)-ABL1(ABL)  | 5–15% |  |  | Adverse (some studies), intermediate (other studies) |
| SET/NUP214             |       |  |  | Unknown                                              |
| ETV6(TEL)-JAK2         | <1%   |  |  | Unknown                                              |
|                        |       |  |  |                                                      |
| Early T-cell precursor |       |  |  | Adverse                                              |

**Abbreviations:** ALL= acute lymphoblastic leukemia. \* With TKI therapy. \*\* In non-Down syndrome-associated ALL. \*\*\* In some studies.

## References

1. Iacobucci, I.; Mullighan, C.G. Genetic basis of acute lymphoblastic leukemia. *J. Clin. Oncol.* **2017**, *35*, 975–983.
2. Chiaretti, S.; Foa, R. T-cell acute lymphoblastic leukemia. *Haematologica* **2009**, *94*, 160–162.
3. Woo, J.S.; Alberti, M.O.; Tirado, C.A. Childhood b-acute lymphoblastic leukemia: A genetic update. *Exp. Hematol. Oncol.* **2014**, *3*, 16.
4. Zhang, L.; Rossi, M.R.; Fisher, K.E. Section ii: Hematolymphoid malignancies. *Curr. Probl. Cancer* **2014**, *38*, 159–174.
5. Hunger, S.P.; Mullighan, C.G. Redefining all classification: Toward detecting high-risk all and implementing precision medicine. *Blood* **2015**, *125*, 3977–3987.
6. Chen, B.; Jiang, L.; Zhong, M.L.; Li, J.F.; Li, B.S.; Peng, L.J.; Dai, Y.T.; Cui, B.W.; Yan, T.Q.; Zhang, W.N.; et al. Identification of fusion genes and characterization of transcriptome features in t-cell acute lymphoblastic leukemia. *Proc. Natl. Acad. Sci. USA* **2018**, *115*, 373–378.
7. Atak, Z.K.; Gianfelici, V.; Hulselmans, G.; De Keersmaecker, K.; Devasia, A.G.; Geerdens, E.; Mentens, N.; Chiaretti, S.; Durinck, K.; Uyttebroeck, A.; et al. Comprehensive analysis of transcriptome variation uncovers known and novel driver events in t-cell acute lymphoblastic leukemia. *PLoS Genet.* **2013**, *9*, e1003997.
8. Neumann, M.; Vosberg, S.; Schlee, C.; Heesch, S.; Schwartz, S.; Gokbuget, N.; Hoelzer, D.; Graf, A.; Krebs, S.; Bartram, I.; et al. Mutational spectrum of adult t-all. *Oncotarget* **2015**, *6*, 2754–2766.
9. Tasian, S.K.; Loh, M.L.; Hunger, S.P. Childhood acute lymphoblastic leukemia: Integrating genomics into therapy. *Cancer* **2015**, *121*, 3577–3590.
10. Taylor, J.; Xiao, W.; Abdel-Wahab, O. Diagnosis and classification of hematologic malignancies on the basis of genetics. *Blood* **2017**, *130*, 410–423.
11. Pui, C.H.; Jeha, S. New therapeutic strategies for the treatment of acute lymphoblastic leukaemia. *Nat. Rev. Drug Discov.* **2007**, *6*, 149–165.
12. Inaba, H.; Greaves, M.; Mullighan, C.G. Acute lymphoblastic leukaemia. *Lancet* **2013**, *381*, 1943–1955.
13. Gowda, C.; Dovat, S. Genetic targets in pediatric acute lymphoblastic leukemia. *Adv. Exp. Med. Biol.* **2013**, *779*, 327–340.
14. Zuckerman, T.; Rowe, J.M. Pathogenesis and prognostication in acute lymphoblastic leukemia. *F1000prime Rep.* **2014**, *6*, 59.
15. Moorman, A.V. New and emerging prognostic and predictive genetic biomarkers in b-cell precursor acute lymphoblastic leukemia. *Haematologica* **2016**, *101*, 407–416.
