# Supplementary material for: New Challenges in Targeting Signaling Pathways in Acute Lymphoblastic Leukemia by NGS Approaches: An Update
Source: MDPI journal article supplement (doi:10.3390/cancers10040110), 2018-04-07
Supplement: s1 [file s1]

**Supplemental File 3. References of Figure 3.** New fusion genes and their frequencies identified by NGS approaches in childhood and adult B-ALL and T-ALL.

| Sense of the reference gene | Reference gene    | Frequency                  | Partners 5'        | Partners 3'        | B-ALL    |       | T-ALL    |       | References |
|-----------------------------|-------------------|----------------------------|--------------------|--------------------|----------|-------|----------|-------|------------|
|                             |                   |                            |                    |                    | Children | Adult | Children | Adult |            |
| 5'                          | <i>IGH</i>        | >5%                        | <i>IGH</i>         | <i>CRLF2</i>       | X        |       |          |       | [1-3]      |
| 5'                          |                   | >5%                        | <i>IGH</i>         | <i>EPOR</i>        | X        |       |          |       | [1,3-5]    |
| 5'                          | <i>KMT2A</i>      | >5%                        | <i>KMT2A</i>       | <i>AFF1(AF4)</i>   | X        | X     |          |       | [6]        |
| 5'                          |                   |                            | <i>KMT2A'</i>      | <i>ARHGEF12</i>    |          | X     |          |       | [6]        |
| 5'                          |                   |                            | <i>KMT2A</i>       | <i>MLLT10</i>      |          |       | X        | X     | [7]        |
| 5'                          |                   |                            | <i>KMT2A</i>       | <i>AF9 (MLLT3)</i> | X        |       |          |       | [6]        |
| 5'                          |                   |                            | <i>KMT2A</i>       | <i>MAML2</i>       | X        | X     |          |       | [8]        |
| 5'                          |                   |                            | <i>KMT2A</i>       | <i>MLLT1</i>       |          |       | X        |       | [9]        |
| 5'                          |                   |                            | <i>KMT2A</i>       | <i>MLLT6</i>       |          |       | X        |       | [9]        |
| 5'                          |                   |                            | <i>KMT2A</i>       | <i>TNRC18</i>      |          |       | X        |       | [9]        |
| 5'                          | <i>MEF2D</i>      | >5%                        | <i>MEF2D</i>       | <i>BCL9</i>        | X        | X     |          |       | [6,10,11]  |
| 5'                          |                   |                            | <i>MEF2D</i>       | <i>DAZAP1</i>      | X        | X     |          |       | [6,10,11]  |
| 5'                          |                   |                            | <i>MEF2D</i>       | <i>HNRNPUL1</i>    | X        |       |          |       | [6,10,11]  |
| 5'                          |                   |                            | <i>MEF2D'</i>      | <i>SS18</i>        | X        |       |          |       | [6]        |
| 5'                          | <i>ETV6(TEL)</i>  | >5%                        | <i>ETV6(TEL)</i>   | <i>RUNX1</i>       | X        |       |          |       | [6]        |
| 5'                          |                   | <5%                        | <i>ETV6(TEL)</i>   | <i>SLC15A5</i>     |          |       | X        |       | [12]       |
| 5'                          |                   |                            | <i>ETV6(TEL)</i>   | <i>NTRK3</i>       | X        |       |          |       | [1]        |
| 5'                          |                   |                            | <i>ETV6(TEL)</i>   | <i>FAM169B</i>     | X        |       |          |       | [5]        |
| 5'                          |                   |                            | <i>ETV6(TEL)</i>   | <i>CD163</i>       | X        |       |          |       | [5]        |
| 5'                          | <i>PAX5</i>       | <5%                        | <i>PAX5</i>        | <i>AUTS2</i>       | X        |       |          |       | [6]        |
| 5'                          |                   |                            | <i>PAX5</i>        | <i>NOL4L</i>       | X        | X     |          |       | [11]       |
| 5'                          |                   |                            | <i>PAX5</i>        | <i>CBFA2T3</i>     | X        |       |          |       | [6]        |
| 5'                          |                   |                            | <i>PAX5</i>        | <i>AF9 (MLLT3)</i> |          | X     |          |       | [6]        |
| 5'                          |                   |                            | <i>PAX5</i>        | <i>MEGF9</i>       | X        |       |          |       | [3]        |
| 5'                          |                   |                            | <i>PAX5</i>        | <i>ZCCHC7</i>      |          | X     |          |       | [6]        |
| 5'                          |                   |                            | <i>PAX5</i>        | <i>ELN</i>         | X        |       |          |       | [5]        |
| 5'                          |                   |                            | <i>PAX5</i>        | <i>ZNF521</i>      | X        |       |          |       | [5]        |
| 5'                          |                   |                            | <i>PAX5</i>        | <i>C20orf112</i>   | X        |       |          |       | [5]        |
| 3'                          | <i>ABCA13</i>     | <5%                        | <i>IKZF1</i>       | <i>ABCA13</i>      |          |       | X        | X     | [13]       |
| 3'                          | <i>ABL1</i>       | >5% in B-ALL, ≤5% in T-ALL | <i>BCR</i>         | <i>ABL1</i>        | X        | X     | X        | X     | [6]        |
| 3'                          |                   |                            | <i>ETV6(TEL)</i>   | <i>ABL1</i>        | X        |       | X        |       | [1]        |
| 3'                          |                   |                            | <i>FOXP1</i>       | <i>ABL1</i>        | X        |       |          |       | [14]       |
| 3'                          |                   |                            | <i>LSM14A</i>      | <i>ABL1</i>        | X        |       |          |       | [1]        |
| 3'                          |                   |                            | <i>NUP153</i>      | <i>ABL1</i>        | X        |       |          |       | [1]        |
| 3'                          |                   |                            | <i>NUP214(CAN)</i> | <i>ABL1</i>        | X        |       | X        | X     | [6,13]     |
| 3'                          |                   |                            | <i>PRRC2B</i>      | <i>ABL1</i>        |          | X     |          |       | [6]        |
| 3'                          |                   |                            | <i>RANBP2</i>      | <i>ABL1</i>        | X        |       |          |       | [1]        |
| 3'                          |                   |                            | <i>RCSD1</i>       | <i>ABL1</i>        | X        |       |          |       | [1,2]      |
| 3'                          |                   |                            | <i>ZMIZ1</i>       | <i>ABL1</i>        | X        |       |          |       | [1]        |
| 3'                          | <i>ABL1</i>       | >5%                        | <i>CENPC</i>       | <i>ABL1</i>        | X        |       |          |       | [1]        |
| 3'                          | <i>ABL1</i>       | <5%                        | <i>ZBTB16</i>      | <i>ABL1</i>        |          |       | X        | X     | [15]       |
| 3'                          | <i>ABL2</i>       | >5%                        | <i>RCSD1</i>       | <i>ABL2</i>        | X        |       |          |       | [1-3]      |
| 3'                          |                   |                            | <i>ZC3HAV1</i>     | <i>ABL2</i>        | X        |       |          |       | [1]        |
| 3'                          | <i>AC016712.2</i> | <5%                        | <i>FARSB</i>       | <i>AC016712.2</i>  |          |       | X        | X     | [9,13]     |
| 3'                          | <i>AC093865.1</i> | <5%                        | <i>IKZF2</i>       | <i>AC093865.1</i>  |          |       | X        | X     | [13]       |
| 3'                          | <i>ACSF3</i>      | <5%                        | <i>CBFA2T3</i>     | <i>ACSF3</i>       |          |       | X        |       | [9]        |
| 3'                          | <i>AFF3</i>       | <5%                        | <i>RUNX1</i>       | <i>AFF3</i>        |          |       | X        |       | [9]        |
| 3'                          | <i>AHI1</i>       | <5%                        | <i>MYB</i>         | <i>AHI1</i>        |          |       | X        | X     | [13]       |
| 3'                          | <i>AK7</i>        | <5%                        | <i>CREBRF</i>      | <i>AK7</i>         |          |       | X        |       | [9]        |
| 3'                          | <i>ALAS2</i>      | <5%                        | <i>PAGE2B</i>      | <i>ALAS2</i>       |          |       | X        | X     | [13]       |
| 3'                          | <i>ANO10</i>      | <5%                        | <i>UQCRC1</i>      | <i>ANO10</i>       |          | X     |          |       | [6]        |
| 3'                          | <i>ARF1</i>       | <5%                        | <i>GUK1</i>        | <i>ARF1</i>        |          |       | X        | X     | [13]       |

|    |          |     |            |          |   |   |   |   |          |
|----|----------|-----|------------|----------|---|---|---|---|----------|
| 3' | ARL17A   | <5% | KIAA1267   | ARL17A   |   |   | X | X | [13]     |
| 3' | ATG16L1  | <5% | CREBBP     | ATG16L1  | X |   |   |   | [5]      |
| 3' | ATP6V0C  | <5% | TSC2       | ATP6V0C  |   | X |   |   | [6]      |
| 3' | BCR      | <5% | PRRC2B     | BCR      |   | X |   |   | [6]      |
| 3' | BMI1     | <5% | ZEB1       | BMI1     |   |   | X | X | [13]     |
| 3' | C17ORF50 | <5% | ING4       | C17ORF50 |   | X |   |   | [6]      |
| 3' | C19orf10 | <5% | MAST3      | C19orf10 |   |   |   | X | [12]     |
| 3' | CCDC12   | <5% | SETD2      | CCDC12   | X |   |   |   | [5]      |
| 3' | CDK5RAP3 | <5% | SMARCC1    | CDK5RAP3 | X |   |   |   | [6]      |
| 3' | CDK6     | <5% | HOXA11-AS1 | CDK6     |   |   | X | X | [13]     |
| 3' | CRBP1    | <5% | FGFRL1     | CRBP1    |   | X |   |   | [6]      |
| 3' | CRLF2 3' | >5% | P2RY8      | CRLF2    | X |   |   |   | [1,2,5]  |
| 3' | CSF1R    | <5% | SSBP2      | CSF1R    | X |   |   |   | [1,14]   |
| 3' |          | <5% | TBL1XR1    | CSF1R    | X |   |   |   | [1]      |
|    |          | <5% | SSBP1      | CSF1R    | X |   |   |   | [14]     |
| 3' | CTBP1    | <5% | FGFRL1     | CTBP1    |   | X |   |   | [6]      |
| 3' | CTDP1    | <5% | PQLC1      | CTDP1    | X | X |   |   | [6]      |
| 3' | CUL2     | <5% | KDM4B      | CUL2     | X |   |   |   | [6]      |
| 3' | CXCR4    | <5% | MGAT4A     | CXCR4    |   |   | X | X | [13]     |
| 3' | DCAF12   | <5% | UBAP1      | DCAF12   |   | X |   |   | [6]      |
| 3' | DDX3X    | <5% | MLLT10     | DDX3X    |   |   | X | X | [13]     |
| 3' | DGKH     | <5% | CDK1       | DGKH     | X |   |   |   | [6]      |
| 3' | DNM3     | <5% | DCAF8      | DNM3     | X |   |   |   | [6]      |
| 3' | DYRK1A   | <5% | ERG        | DYRK1A   | X |   |   |   | [5]      |
| 3' | ERG      | <5% | FUS        | ERG      | X |   |   |   | [6]      |
| 3' | ETV6     | <5% | TCF3       | ETV6     | X |   |   |   | [5]      |
| 3' |          | <5% | NIPBL      | ETV6     |   |   | X |   | [9]      |
| 3' | EVX1     | <5% | RUNX1      | EVX1     |   |   | X |   | [9]      |
| 3' | FAS      | <5% | PTEN       | FAS      |   |   |   | X | [12]     |
| 3' | FBRSL1   | <5% | NOC4L      | FBRSL1   | X |   |   |   | [6]      |
| 3' |          | <5% | POLE       | FBRSL1   | X |   |   |   | [6]      |
| 3' | FER      | <5% | SSBP2      | FER      |   |   | X | X | [13]     |
| 3' | FGFR1    | <5% | FGFR1OP    | FGFR1    |   |   | X |   | [9]      |
| 3' | FYTDD1   | <5% | MFI2       | FYTDD1   |   | X |   |   | [6]      |
| 3' | GART     | <5% | RUNX1      | GART     | X |   |   |   | [6]      |
| 3' | GHR      | <5% | HDAC4      | GHR      |   |   | X |   | [9]      |
| 3' | GPR128   | <5% | TFG        | GPR128   | X |   |   |   | [5]      |
| 3' | GPR39    | <5% | MGAT5      | GPR39    |   |   | X | X | [13]     |
| 3' | GS1      | <5% | GATA3      | GS1      |   |   |   | X | [12]     |
| 3' | HLF      | <5% | TCF3       | HLF      | X |   |   |   | [6]      |
| 3' | HNRNPC   | <5% | ZNF219     | HNRNPC   |   |   | X | X | [13]     |
| 3' | HOXA10   | >5% | TCRB       | HOXA10   |   |   | X | X | [10]     |
| 3' | HOXA11   | >5% | TCRB       | HOXA11   |   |   | X | X | [12]     |
| 3' |          | >5% | MIR181A1HG | HOXA11   |   |   | X |   | [12]     |
| 3' |          | >5% | PUM1       | HOXA11   |   |   | X |   | [9]      |
| 3' |          | <5% | DPY19L1    | HOXA11   |   |   | X | X | [13]     |
| 3' | HOXA9    | >5% | TCRB       | HOXA9    |   |   | X | X | [10]     |
| 3' | IFNWP19  | <5% | CDKN2A     | IFNWP19  |   |   | X | X | [13]     |
| 3' | IGH      | <5% | IL3        | IGH      |   | X |   |   | [16]     |
| 3' | JAK2 3'  |     | BCR        | JAK2     | X |   |   |   | [1,14]   |
| 3' |          |     | EBF1       | JAK2     | X |   |   |   | [6]      |
| 3' |          |     | PAX5       | JAK2     |   | X |   |   | [1,6,14] |
| 3' |          |     | SSBP2      | JAK2     | X |   |   |   | [3]      |
| 3' |          |     | SNX29      | JAK2     |   | X |   |   | [6]      |
| 3' |          | >5% | STRN3      | JAK2     | X | X |   |   | [4]      |
| 3' |          |     | PCM1       | JAK2     | X |   |   |   | [1]      |
| 3' |          |     | RFX3       | JAK2     | X |   |   |   | [1]      |
| 3' |          |     | USP25      | JAK2     | X |   |   |   | [1]      |
| 3' |          |     | TERF2      | JAK2     | X |   |   |   | [14]     |
| 3' |          |     | ZNF274     | JAK2     | X |   |   |   | [1]      |
| 3' | KIF6     | <5% | KCNK17     | KIF6     |   |   | X | X | [13]     |
| 3' | KIF7     | <5% | PRC1       | KIF7     | X |   |   |   | [6]      |

|    |              |     |              |              |   |   |   |   |            |
|----|--------------|-----|--------------|--------------|---|---|---|---|------------|
| 3' | LCK          | <5% | TRD          | LCK          |   |   | X | X | [17]       |
| 3' | LMO1         | <5% | TCRB         | LMO1         |   |   | X | X | [17]       |
| 3' |              | <5% | TCRD         | LMO1         |   |   | X | X | [17]       |
| 3' | LMO2         | >5% | TCRB         | LMO2         |   |   | X | X | [12]       |
| 3' | LYL1         | <5% | TCRB         | LYL1         |   |   | X | X | [17]       |
| 3' | LYN          | <5% | GATAD2A      | LYN          | X |   |   |   | [1]        |
| 3' | MAD1L1       | <5% | TTYH3        | MAD1L1       |   | X |   |   | [6]        |
| 3' | MAFG         | <5% | ASCC1        | MAFG         |   |   | X | X | [13]       |
| 3' | MEF2C        | <5% | CLINT1       | MEF2C        |   |   | X | X | [13]       |
| 3' | MEF2D        | >5% | SS18         | MEF2D        | X |   |   |   | [6]        |
| 3' | METRNL       | <5% | PIM3         | METRNL       | X |   |   |   | [6]        |
| 3' |              | <5% | CSNK1D       | METRNL       | X |   |   |   | [6]        |
| 3' | MLLT10       | >5% | PICALM       | MLLT10       |   |   | X |   | [9]        |
| 3' | MLLT10       | <5% | DDX3X        | MLLT10       |   |   | X | X | [13]       |
| 3' | MSH6         | <5% | SSBP2        | MSH6         | X |   |   |   | [5]        |
| 3' | MTCP1        | <5% | TCRA         | MTCP1        |   |   | X | X | [18]       |
| 3' |              | <5% | TCRD         | MTCP1        |   |   | X | X | [18]       |
| 3' | NCLN         | <5% | PALM         | NCLN         |   | X |   |   | [6]        |
| 3' | NKD2         | <5% | SLC12A7      | NKD2         |   | X |   |   | [6]        |
| 3' | NKX2-2       | >5% | TCRG         | NKX2-2       |   |   | X |   | [19]       |
| 3' | NKX2-5       | <5% | BCL11B       | NKX2-5       |   |   | X |   | [9]        |
| 3' | NLRP6        | <5% | RP11-326C3.2 | NLRP6        |   |   | X | X | [13]       |
| 3' | NOTCH1       | <5% | SEC16A       | NOTCH1       |   |   | X |   | [9]        |
| 3' | NPR2         | <5% | HINT2        | NPR2         | X |   |   |   | [6]        |
| 3' | NUP214       | >5% | SET          | NUP214       |   |   |   | X | [9,19]     |
| 3' | NUP98        | <5% | PSIP1        | NUP98        |   |   | X | X | [13]       |
| 3' | NUTM1        | <5% | ACIN1        | NUTM1        | X |   |   |   | [6]        |
| 3' | PAQR6        | <5% | SMG5         | PAQR6        |   |   |   | X | [12]       |
| 3' | PAX5         | ≤5% | EMILIN2      | PAX5         |   | X |   |   | [6]        |
| 3' | PBX1         | >5% | TCF3         | PBX1         | X | X |   |   | [6]        |
| 3' | PDE9A        | <5% | WDR4         | PDE9A        | X |   |   |   | [6]        |
| 3' | PDGFRA       | <5% | FIP1L1       | PDGFRA       | X |   |   |   | [3]        |
| 3' | PDGFRB       | <5% | ETV6(TEL)    | PDGFRB       |   | X |   |   | [1,4]      |
| 3' |              |     | TNIP1        | PDGFRB       | X |   |   |   | [1,4]      |
| 3' |              |     | ZMYND8       | PDGFRB       | X |   |   |   | [1,4]      |
| 3' |              |     | CD74         | PDGFRB       | X |   |   |   | [6]        |
| 3' |              |     | EBF1         | PDGFRB       | X |   |   |   | [1,2,4,14] |
| 3' |              |     | ATF7IP       | PDGFRB       | X |   |   |   | [1,4]      |
| 3' | PLAGL1       | <5% | MYB          | PLAGL1       |   |   | X |   | [9]        |
| 3' | PNRC1        | <5% | SYNCRIP      | PNRC1        | X |   |   |   | [5]        |
| 3' | PPP1R36      | <5% | UBA2         | PPP1R36      | X |   |   |   | [6]        |
| 3' | PRKAR1B      | <5% | PCMTD1       | PRKAR1B      |   |   | X | X | [13]       |
| 3' | PSIP1        | <5% | NUP98        | PSIP1        |   |   | X | X | [13]       |
| 3' | PSMD11       | <5% | NF1          | PSMD11       |   |   | X |   | [9]        |
| 3' | PTPRK        | <5% | L3MBTL3      | PTPRK        |   |   | X | X | [13]       |
| 3' | PVT1         | <5% | UGCG         | PVT1         |   |   | X | X | [13]       |
| 3' | RAB38        | <5% | CTSC         | RAB38        |   |   | X | X | [13]       |
| 3' | RBM38        | <5% | SS18L1       | RBM38        | X |   |   |   | [5]        |
| 3' | RNF126       | <5% | OAZ1         | RNF126       |   |   | X | X | [13]       |
| 3' | RP11-326C3.2 | <5% | NLRP6        | RP11-326C3.2 |   |   | X | X | [13]       |
| 3' | RPL35P4      | <5% | CDK6         | RPL35P4      |   |   | X | X | [13]       |
| 3' | SCIN         | <5% | NDUFA4       | SCIN         |   | X |   |   | [6]        |
| 3' | SET          | <5% | FUS          | SET          |   |   | X | X | [13]       |
| 3' | SLC7A5       | <5% | PIM3         | SLC7A5       | X |   |   |   | [6]        |
| 3' |              | <5% | CD81         | SLC7A5       | X |   |   |   | [6]        |
| 3' |              | <5% | CBFA2T3      | SLC7A5       | X |   |   |   | [5]        |
| 3' | SLC7A6       | <5% | CTCF         | SLC7A6       |   |   | X |   | [9]        |
| 3' | SMARCA2      | <5% | ZNF362       | SMARCA2      |   | X |   |   | [6]        |
| 3' | SMCHD1       | <5% | USP9X        | SMCHD1       | X |   |   |   | [5]        |
| 3' | SNX29        | >5% | JAK2         | SNX29        |   | X |   |   | [6]        |
| 3' | SOX8         | <5% | TRAC         | SOX8         |   |   |   | X | [12]       |

|    |                  |     |                   |                |   |   |   |   |        |
|----|------------------|-----|-------------------|----------------|---|---|---|---|--------|
| 3' | <i>SPI1</i>      | <5% | <i>STMN1</i>      | <i>SPI1</i>    |   |   | X |   | [9]    |
| 3' | <i>SPI1</i>      | <5% | <i>TCF7</i>       | <i>SPI1</i>    |   |   | X |   | [9]    |
| 3' | <i>STAT3</i>     | <5% | <i>STAT5B</i>     | <i>STAT3</i>   |   |   | X | X | [13]   |
| 3' | <i>STIP1</i>     | <5% | <i>RTN3</i>       | <i>STIP1</i>   | X |   |   |   | [6]    |
| 3' | <i>TAL1</i>      | >5% | <i>STIL</i>       | <i>TAL1</i>    |   |   | X | X | [9,12] |
| 3' | <i>TAL1</i>      | >5% | <i>TCRB</i>       | <i>TAL1</i>    |   |   | X | X | [12]   |
| 3' | <i>TCRD</i>      | <5% | <i>TLX1NB</i>     | <i>TCRD</i>    |   |   | X |   | [9]    |
| 3' |                  | <5% | <i>NKX2-1-AS1</i> | <i>TCRD</i>    |   |   | X |   | [9]    |
| 3' | <i>TGIF1</i>     | <5% | <i>MBP</i>        | <i>TGIF1</i>   | X |   |   |   | [6]    |
| 3' | <i>THEM7P</i>    | <5% | <i>WT1</i>        | <i>THEM7P</i>  |   |   |   | X | [12]   |
| 3' | <i>TMEM259</i>   | <5% | <i>PTBP1</i>      | <i>TMEM259</i> | X |   |   |   | [6]    |
| 3' | <i>TNFSF18</i>   | <5% | <i>RFWD2</i>      | <i>TNFSF18</i> |   | X |   |   | [6]    |
| 3' | <i>TNK2</i>      | <5% | <i>MFI2</i>       | <i>TNK2</i>    |   | X |   |   | [6]    |
| 3' | <i>TPM3</i>      | <5% | <i>B4GALT3</i>    | <i>TPM3</i>    |   |   | X | X | [13]   |
| 3' |                  | <5% | <i>JAK2</i>       | <i>TPM3</i>    |   |   | X | X | [13]   |
| 3' | <i>TRBC1</i>     | <5% | <i>RIC3</i>       | <i>TRBC1</i>   |   |   | X | X | [13]   |
| 3' | <i>TRBC2</i>     | <5% | <i>IL7R</i>       | <i>TRBC2</i>   |   |   | X | X | [13]   |
| 3' | <i>TRBJ2-7</i>   | <5% | <i>PLAG1</i>      | <i>TRBJ2-7</i> |   |   | X | X | [13]   |
| 3' | <i>TRDC</i>      | >5% | <i>TAL1</i>       | <i>TRDC</i>    |   |   |   | X | [12]   |
| 3' |                  | <5% | <i>SFTA3</i>      | <i>TRDC</i>    |   |   | X | X | [13]   |
| 3' |                  | <5% | <i>TLX1NB</i>     | <i>TRDC</i>    |   |   | X | X | [5]    |
| 3' | <i>TSLP</i>      | <5% | <i>IQGAP2</i>     | <i>TSLP</i>    | X |   |   |   | [13]   |
| 3' | <i>TYK2</i>      | <5% | <i>MYB</i>        | <i>TYK2</i>    | X |   |   |   | [5]    |
| 3' | <i>UFC1</i>      | <5% | <i>VANGL2</i>     | <i>UFC1</i>    |   |   | X |   | [9]    |
| 3' | <i>USP9Y</i>     | <5% | <i>TTY15</i>      | <i>USP9Y</i>   |   |   |   | X | [12]   |
| 3' | <i>WDFY2</i>     | <5% | <i>RB1</i>        | <i>WDFY2</i>   |   | X |   |   | [6]    |
| 3' | <i>XIST</i>      | <5% | <i>KDM6A</i>      | <i>XIST</i>    | X |   |   |   | [5]    |
| 3' | <i>ZBTB18</i>    | <5% | <i>HNRNPU</i>     | <i>ZBTB18</i>  | X |   |   |   | [6]    |
| 3' | <i>ZFP36L1</i>   | <5% | <i>SFPQ</i>       | <i>ZFP36L1</i> |   |   | X |   | [9]    |
| 3' | <i>ZNF219</i>    | <5% | <i>HNRNPC</i>     | <i>ZNF219</i>  |   |   | X | X | [6]    |
| 3' | <i>ZNF362</i>    | <5% | <i>SMARCA2</i>    | <i>ZNF362</i>  | X |   |   |   | [13]   |
| 3' | <i>ZNF384 3'</i> | >5% | <i>CREBBP</i>     | <i>ZNF384</i>  | X |   |   |   | [6,10] |
| 3' |                  |     | <i>EP300</i>      | <i>ZNF384</i>  | X | X |   |   | [6]    |
| 3' |                  |     | <i>EWSR1</i>      | <i>ZNF384</i>  | X | X |   |   | [6]    |
| 3' |                  |     | <i>TAF15</i>      | <i>ZNF384</i>  |   | X |   |   | [6]    |
| 3' |                  |     | <i>TCF3</i>       | <i>ZNF384</i>  | X |   |   |   | [6]    |

## References

1. Reshmi, S.C.; Harvey, R.C.; Roberts, K.G.; Stonerock, E.; Smith, A.; Jenkins, H.; Chen, I.M.; Valentine, M.; Liu, Y.; Li, Y.; et al. Targetable kinase gene fusions in high-risk b-all: A study from the children's oncology group. *Blood* **2017**, *129*, 3352–3361.
2. Yap, K.L.; Furtado, L.V.; Kiyotani, K.; Curran, E.; Stock, W.; McNeer, J.L.; Kadri, S.; Segal, J.P.; Nakamura, Y.; Le Beau, M.M.; et al. Diagnostic evaluation of rna sequencing for the detection of genetic abnormalities associated with ph-like acute lymphoblastic leukemia (all). *Leuk. Lymphoma* **2017**, *58*, 950–958.
3. He, J.; Abdel-Wahab, O.; Nahas, M.K.; Wang, K.; Rampal, R.K.; Intlekofer, A.M.; Patel, J.; Krivstov, A.; Frampton, G.M.; Young, L.E.; et al. Integrated genomic DNA/rna profiling of hematologic malignancies in the clinical setting. *Blood* **2016**, *127*, 3004–3014.
4. Malinowska, I.; Glodkowska-Mrowka, E. Chapter 5—next generation sequencing in hematological disorders. In *Clinical applications for next-generation sequencing*; Academic Press: Boston, MA, USA, 2016; pp 75–96.
5. Roberts, K.G.; Li, Y.; Payne-Turner, D.; Harvey, R.C.; Yang, Y.L.; Pei, D.; McCastlain, K.; Ding, L.; Lu, C.; Song, G.; et al. Targetable kinase-activating lesions in ph-like acute lymphoblastic leukemia. *N. Engl. J. Med.* **2014**, *371*, 1005–1015.
6. Liu, Y.F.; Wang, B.Y.; Zhang, W.N.; Huang, J.Y.; Li, B.S.; Zhang, M.; Jiang, L.; Li, J.F.; Wang, M.J.; Dai, Y.J.; et al. Genomic profiling of adult and pediatric b-cell acute lymphoblastic leukemia. *EBioMedicine* **2016**, *8*, 173–183.

7. Ghazavi, F.; Lammens, T.; Van Roy, N.; Poppe, B.; Speleman, F.; Benoit, Y.; Van Vlierberghe, P.; De Moerloose, B. Molecular basis and clinical significance of genetic aberrations in b-cell precursor acute lymphoblastic leukemia. *Exp. Hematol.* **2015**, *43*, 640–653.
8. Menu, E.; Beaufils, N.; Usseglio, F.; Balducci, E.; Lafage Pochitaloff, M.; Costello, R.; Gabert, J. First case of b all with kmt2a-maml2 rearrangement: A case report. *BMC Cancer* **2017**, *17*, 363.
9. Seki, M.; Kimura, S.; Isobe, T.; Yoshida, K.; Ueno, H.; Nakajima-Takagi, Y.; Wang, C.; Lin, L.; Kon, A.; Suzuki, H.; et al. Recurrent spi1 (pu.1) fusions in high-risk pediatric t cell acute lymphoblastic leukemia. *Nat. Genet.* **2017**, *49*, 1274–1281.
10. Iacobucci, I.; Mullighan, C.G. Genetic basis of acute lymphoblastic leukemia. *J. Clin. Oncol.* **2017**, *35*, 975–983.
11. Suzuki, K.; Okuno, Y.; Kawashima, N.; Muramatsu, H.; Okuno, T.; Wang, X.; Kataoka, S.; Sekiya, Y.; Hamada, M.; Murakami, N.; et al. Mef2d-bcl9 fusion gene is associated with high-risk acute b-cell precursor lymphoblastic leukemia in adolescents. *J. Clin. Oncol.* **2016**, *34*, 3451–3459.
12. Gianfelici, V.; Chiaretti, S.; Demeyer, S.; Di Giacomo, F.; Messina, M.; La Starza, R.; Peragine, N.; Paoloni, F.; Geerdens, E.; Pierini, V.; et al. Rna sequencing unravels the genetics of refractory/relapsed t-cell acute lymphoblastic leukemia. Prognostic and therapeutic implications. *Haematologica* **2016**, *101*, 941–950.
13. Atak, Z.K.; Gianfelici, V.; Hulselmans, G.; De Keersmaecker, K.; Devasia, A.G.; Geerdens, E.; Mentens, N.; Chiaretti, S.; Durinck, K.; Uyttebroeck, A.; et al. Comprehensive analysis of transcriptome variation uncovers known and novel driver events in t-cell acute lymphoblastic leukemia. *PLoS Genet.* **2013**, *9*, e1003997.
14. Boer, J.M.; Steeghs, E.M.; Marchante, J.R.; Boeree, A.; Beaudoin, J.J.; Beverloo, H.B.; Kuiper, R.P.; Escherich, G.; van der Velden, V.H.; van der Schoot, C.E.; et al. Tyrosine kinase fusion genes in pediatric bcr-abl1-like acute lymphoblastic leukemia. *Oncotarget* **2017**, *8*, 4618–4628.
15. Chen, B.; Jiang, L.; Zhong, M.L.; Li, J.F.; Li, B.S.; Peng, L.J.; Dai, Y.T.; Cui, B.W.; Yan, T.Q.; Zhang, W.N.; et al. Identification of fusion genes and characterization of transcriptome features in t-cell acute lymphoblastic leukemia. *Proc. Natl. Acad. Sci. USA* **2018**, *115*, 373–378.
16. Derriex, C.; Freynet, N.; Frayfer, J.; Delabesse, E.; Clappier, E.; Defasque, S.; Broutier, H.; Fouillard, L. A case of b-cell precursor acute lymphoblastic leukemia with il3-igh rearrangement revealed by thromboembolism and marked eosinophilia. *Leuk. Lymphoma* **2018**, 1–4.
17. Chiaretti, S.; Foa, R. T-cell acute lymphoblastic leukemia. *Haematologica* **2009**, *94*, 160–162.
18. Stern, M.H.; Soulier, J.; Rosenzweig, M.; Nakahara, K.; Canki-Klain, N.; Aurias, A.; Sigaux, F.; Kirsch, I.R. Mtcp-1: A novel gene on the human chromosome xq28 translocated to the t cell receptor alpha/delta locus in mature t cell proliferations. *Oncogene* **1993**, *8*, 2475–2483.
19. Girardi, T.; Vicente, C.; Cools, J.; De Keersmaecker, K. The genetics and molecular biology of t-all. *Blood* **2017**, *129*, 1113–1123.
